# Supplementary material for: The use of modelling studies to inform planning of health services: case study of rapidly increasing endoscopy services in Australia
Source: Springer Nature journal article supplement (doi:10.1186/s12913-019-4438-x), 2019-08-29
Supplement: MOESM2 [file 17117068]

*Data inputs*

| Category                                  | Parameter description | HSA          | HSB          | Source                                           |
|-------------------------------------------|-----------------------|--------------|--------------|--------------------------------------------------|
| Demand projections                        | 2017 (base year)      | 14,944       | 12,242       | State government demand forecasting*             |
|                                           | 2018                  | 16,631       | 14,598       |                                                  |
|                                           | 2019                  | 18,315       | 16,958       |                                                  |
|                                           | 2020                  | 19,997       | 19,321       |                                                  |
|                                           | 2021                  | 21,677       | 21,686       |                                                  |
| Patient presentation to system            | Facilitated access    | 57%          |              | HSA administrative data                          |
|                                           | Specialist outpatient | 37%          |              | HSA administrative data                          |
|                                           | NBCSP                 | 5%           |              | State government NBCSP projections               |
|                                           | Emergency department  | 1%           |              | Expert opinion, supported by administrative data |
| Initial waiting list numbers, by category | Category 4            | 738          | 504          | State government administrative data             |
|                                           | Category 5            | 2,266        | 835          |                                                  |
|                                           | Category 6            | 1,188        | 521          |                                                  |
|                                           | <b>Total</b>          | <b>4,192</b> | <b>1,860</b> |                                                  |
| Waiting list movements                    | <b>Category 4</b>     |              |              | State government administrative data             |
|                                           | Patients seen         | 535          | 624          |                                                  |
|                                           | Patients added        | 642          | 796          |                                                  |
|                                           | Patients removed      | 7            | 5            |                                                  |
|                                           | <b>Category 5</b>     |              |              |                                                  |
|                                           | Patients seen         | 324          | 321          |                                                  |
|                                           | Patients added        | 423          | 409          |                                                  |
|                                           | Patients removed      | 18           | 9            |                                                  |
|                                           | <b>Category 6</b>     |              |              |                                                  |
| Patients seen                             | 50                    | 84           |              |                                                  |
| Patients added                            | 85                    | 107          |              |                                                  |
| Patients removed                          | 12                    | 6            |              |                                                  |

|                                                                     |                                                          |                            |                                               |
|---------------------------------------------------------------------|----------------------------------------------------------|----------------------------|-----------------------------------------------|
| Post-endoscopy outcomes, patients presenting via GP, hospital or ED | Specialist management of chronic conditions              | 10%                        | HSB hospital audit data^                      |
|                                                                     | Elective surgery for the treatment of late stage cancer# | 1.25%                      | State government administrative data          |
|                                                                     | Early detection endoscopic treatment                     | 9%                         | HSB hospital audit data^                      |
|                                                                     | Recall procedure                                         | 3.40%                      | HSB hospital audit data^                      |
|                                                                     | Surveillance procedure                                   | 25%                        | HSB hospital audit data^                      |
|                                                                     | <i>relative proportion within 3 years</i>                | <i>39% of surveillance</i> | HSB hospital audit data^                      |
|                                                                     | <i>relative proportion within 5 years</i>                | <i>61% of surveillance</i> | HSB hospital audit data^                      |
| Ongoing GP management                                               | ~ 51%                                                    | Remaining proportion       |                                               |
| Post-endoscopy outcomes, patients presenting via NBCSP              | Specialist management of chronic conditions              | 10%                        | HSB hospital audit data^                      |
|                                                                     | Elective surgery for the treatment of late stage cancer^ | 0.80%                      | Adjusted risk based on Doubeni et al [19]     |
|                                                                     | Early detection endoscopic treatment                     | 7%                         | Adjusted risk based on Doubeni et al [19]     |
|                                                                     | Recall procedure                                         | 3.40%                      | HSB hospital audit data^                      |
|                                                                     | Surveillance procedure                                   | 0%                         | NA#                                           |
|                                                                     | Ongoing GP management                                    | ~ 79%                      | Remaining proportion                          |
| Costs                                                               | Outpatient clinic                                        | 285                        | State government reimbursement item cost [20] |
|                                                                     | Facilitated access                                       | 234                        | State government reimbursement item cost [20] |
|                                                                     | Nurse led colon consent clinic                           | 234                        | State government reimbursement item cost [20] |
|                                                                     | Inpatient endoscopic procedures                          | 6,700                      | State government administrative data          |
|                                                                     | Outpatient endoscopic procedures                         | 1,585                      | State government price weight [20]            |
|                                                                     | Elective surgery for late stage colorectal cancer        | 16,854                     | State government administrative data          |
|                                                                     | All other ongoing care states                            | 0                          | Simplifying assumption                        |
| 5 year survival rates                                               | Early stage bowel cancer                                 | 0.875                      | Heitman et al [21]                            |
|                                                                     | Late stage bowel cancer                                  | 0.335                      | Heitman et al [21]                            |
|                                                                     | All other states                                         | Varies by age              | Australian life tables [22]                   |
| Health state utility values                                         | Specialist treatment for chronic conditions (severe IBD) | 0.72                       | Gibson et al [23]                             |
|                                                                     | Advanced bowel cancer                                    | 0.74                       | Heitman et al [21]                            |
|                                                                     | Early bowel cancer                                       | 0.46                       | Heitman et al [21]                            |
|                                                                     | All other health states                                  | 1                          | Simplifying assumption                        |

HSA = health service A; HSB = health service B; NBCSP = National Bowel Cancer Screening Program; GP = general practitioner; ED = emergency department.

\*Based on historic demand trends with an additional allowance for the increase in NBCSP presentations

^Audit on endoscopy outcome data from two hospitals based in HSB

#Surveillance procedures for NBCSP patients are accounted for in demand projections

~ These figures are an approximation derived as a function of the remaining proportion after transitions to other health states have been accounted for.
